# Supplementary material for: Comparison of hydrogen production and electrical power generation for energy capture in closed-loop ammonium bicarbonate reverse electrodialysis systems
Source: Royal Society of Chemistry journal article supplement (doi:10.1039/c3cp54351j), 2013-11-26
Supplement: c3cp54351j.pdf [file c3cp54351j.pdf]

# Supporting Information

1

## 2                    **Comparison of Hydrogen Production and Electrical Power** 3                    **Generation for Energy Capture in Closed-Loop Ammonium Bicarbonate** 4                    **Reverse Electrodialysis Systems**

2

3

4

5

6

Marta C. Hatzell<sup>a</sup>, Ivan Ivanov<sup>b</sup>, Roland Cusick<sup>b</sup>, Xiuping Zhu<sup>b</sup> and Bruce E. Logan<sup>b\*</sup>

7

<sup>a</sup> Department of Mechanical and Nuclear Engineering, The Pennsylvania State  
8                    University, University Park, PA 16802, USA.

8

9

<sup>b</sup> Department of Civil and Environmental Engineering, 131 Sackett Building,  
10                    The Pennsylvania State University, University Park, PA 16802, USA.

10

11

12

13

14

\*Corresponding Author: E-mail: blogan@psu.edu; phone: +1-814-863-7908

15

16

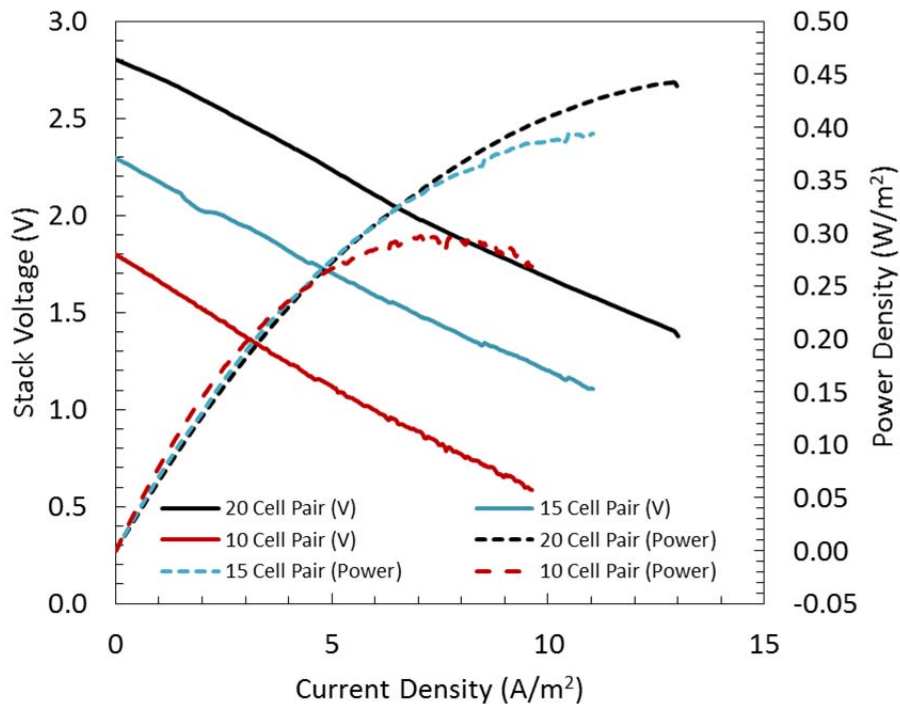

17

18 **Figure 1s:** Reverse electrodiolysis stack performance for 10, 15 and 20 cell pair.

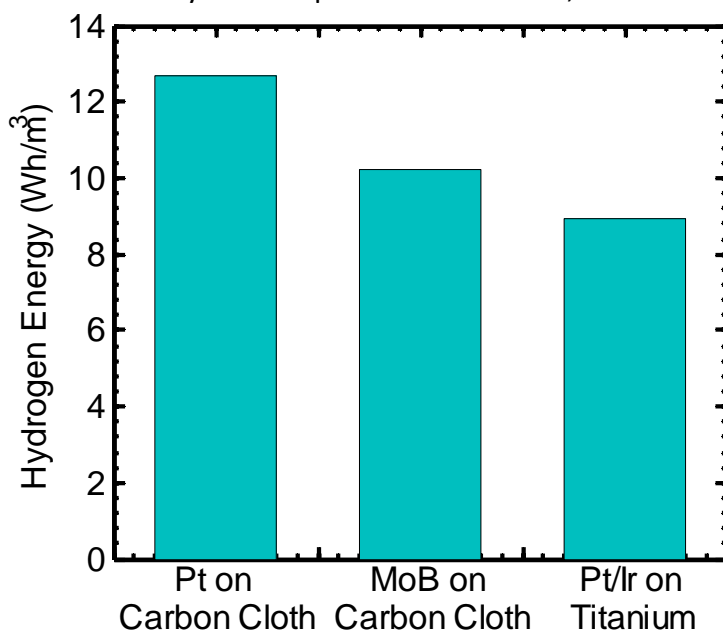

19

20

21 **Figure 2s:** Evaluation of energy extracted through hydrogen evolution reacting  
22 electrodes.

23

24
